# Supplementary material for: Changes in Lolium perenne transcriptome during cold acclimation in two genotypes adapted to different climatic conditions
Source: BMC Plant Biol. 2015 Oct 17;15:250. doi: 10.1186/s12870-015-0643-x (PMC4609083; doi:10.1186/s12870-015-0643-x)
Supplement: Additional file 14: — Major functional domains of differentially expressed proteins in ‘Falster’ genotype of perennial ryegrass ( Lolium perenne L.) during cold acclimation identified by the DAVID tool. (XLSX 10 kb) [file 12870_2015_643_MOESM14_ESM.xlsx]

## Sheet: Additional file 14
Additional file 14. Major functional domains of differentially expressed proteins in 'Falster' genotype of perennial ryegrass (Lolium perenne L.) during cold acclimation identified by the DAVID tool.
Category	Term	Count	%	PValue	Genes	List Total	Pop Hits	Pop Total	Fold Enrichment	Bonferroni	Benjamini	FDR
SMART	SM00054:EFh	11	0.5164319248826291	2.7126e+11	Q5ZCK5, Q338P8, Q75KU4, Q75LU8, Q0JC44, Q3HRN7, Q3HRP5, Q8RZB5, Q5ZAJ0, Q10LX4, P53683	102	120	6051	5437990196078430	0.001382487077952299	0.001382487077952299	0.026238490116448077
SMART	SM00332:PP2Cc	8	0.3755868544600939	2.93355e+11	Q0DBU3, Q7XCJ7, A3A8W2, Q6ETK3, Q6L482, Q6EN45, Q5JKN1, Q94H98	102	78	6051	608446455505279	0.014851924107733061	0.007453741182675722	0.28343017807110904
SMART	SM00331:PP2C_SIG	8	0.3755868544600939	2.93355e+11	Q0DBU3, Q7XCJ7, A3A8W2, Q6ETK3, Q6L482, Q6EN45, Q5JKN1, Q94H98	102	78	6051	608446455505279	0.014851924107733061	0.007453741182675722	0.28343017807110904
SMART	SM00220:S_TKc	12	0.5633802816901409	9.09733e+10	Q6H7U5, Q6Z8C8, Q0DCT8, Q75H77, Q2QMI0, Q5ZCI1, Q7XQP4, Q10SC8, P53683, Q0JI49, Q7XIW5, Q5VN19	102	217	6051	3280563838438600	0.04535669494405936	0.015353419394120826	0.8766085297238102
SMART	SM00385:CYCLIN	5	0.2347417840375587	0.005950614881156727	Q0JIF2, Q2RAC5, Q7XSJ6, Q10D80, Q0E474	102	44	6051	6741310160427800	0.2624252997483172	0.07327366880365471	5610278693964050
SMART	SM00415:HSF	4	0.18779342723004694	0.00627220421246154	Q8H7Y6, Q338B0, Q6K6S5, Q84MN7	102	23	6051	1.03171e+16	0.27449681265958814	0.06216191549366301	5905273008228290
SMART	SM00498:FH2	3	0.14084507042253522	0.0354755246211475	Q7G6K7, Q6ZCX3, Q6K8Z4	102	18	6051	9887254901960780	0.8415194818151	0.26436455418247173	294906121444652
